# Supplementary material for: Synthesis and Characterization of TiO2 Nanoparticles for the Reduction of Water Pollutants
Source: Materials (Basel). 2017 Oct 20;10(10):1208. doi: 10.3390/ma10101208 (PMC5667014; doi:10.3390/ma10101208)

Article\*

# Synthesis and Characterization of TiO<sub>2</sub> Nanoparticles for the Reduction of Water Pollutants

Gigliola Lusvardi <sup>1,\*</sup>, Corrado Barani <sup>2</sup>, Federica Giubertoni <sup>2</sup> and Giulia Paganelli <sup>1</sup>

<sup>1</sup> Department of Chemistry and Geological Sciences, University of Modena and Reggio Emilia, Via G. Campi 103, 41125 Modena, Italy; giulipez91@gmail.com

<sup>2</sup> Barchemicals, Via S. Allende 14, 41051 Castelnovo Rangone (MO), Italy; barani.corrado@barchemicals.it (C.B.); giubertoni.federica@barchemicals.it (F.G.)

\* Correspondence: gigliola.lusvardi@unimore.it, Tel.: +39-059-205-8549

Received: 30 August 2017; Accepted: 18 October 2017; Published: date

## Supplementary Materials

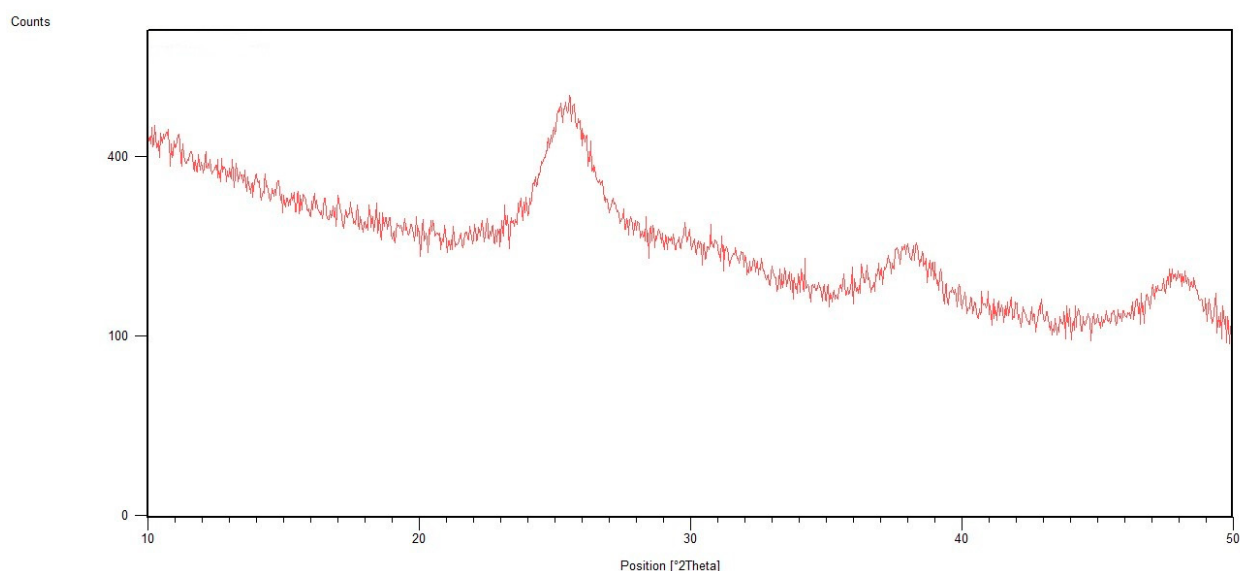

**Figure S1.** XRPD pattern of sample of Synthesis 1.

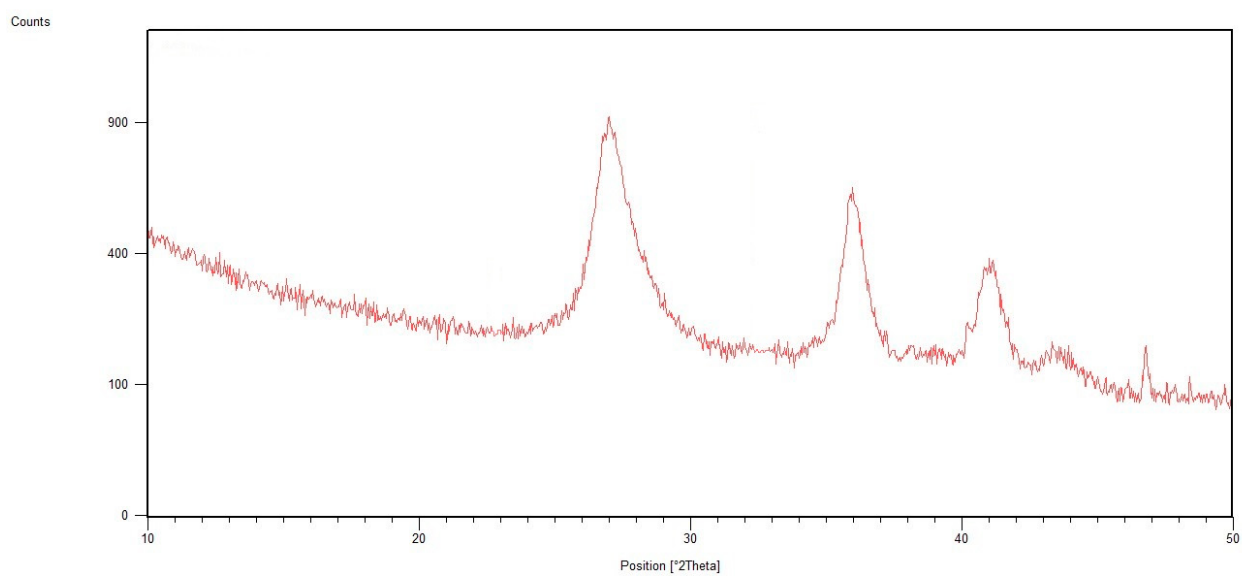

**Figure S2.** XRPD pattern of sample of Synthesis 2.

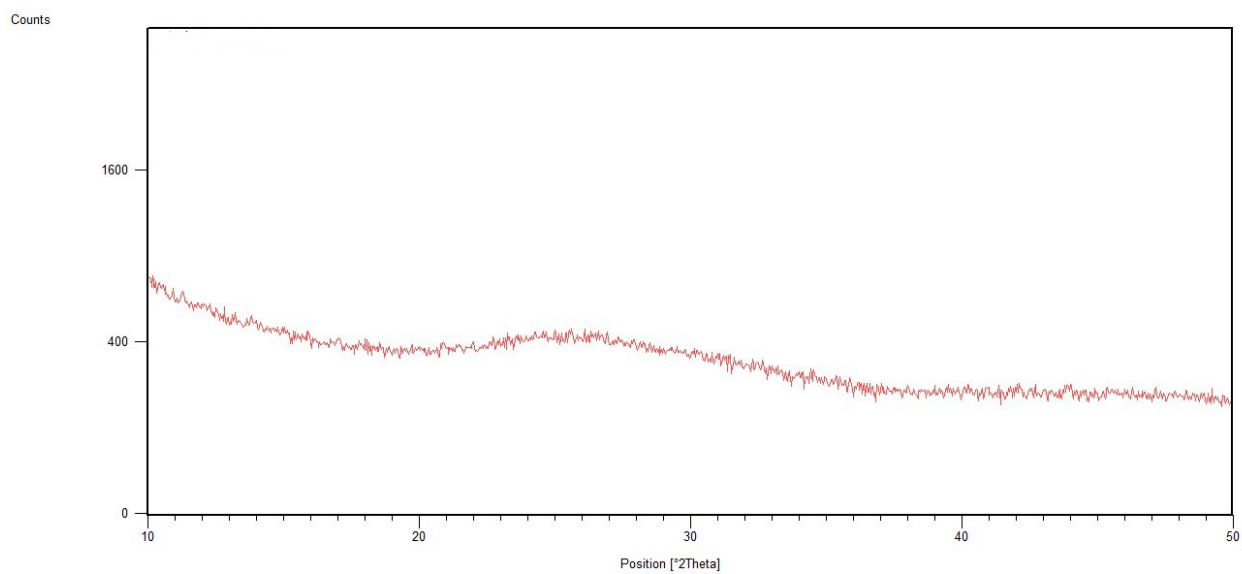

**Figure S3.** XRPD pattern of sample of Synthesis 3.

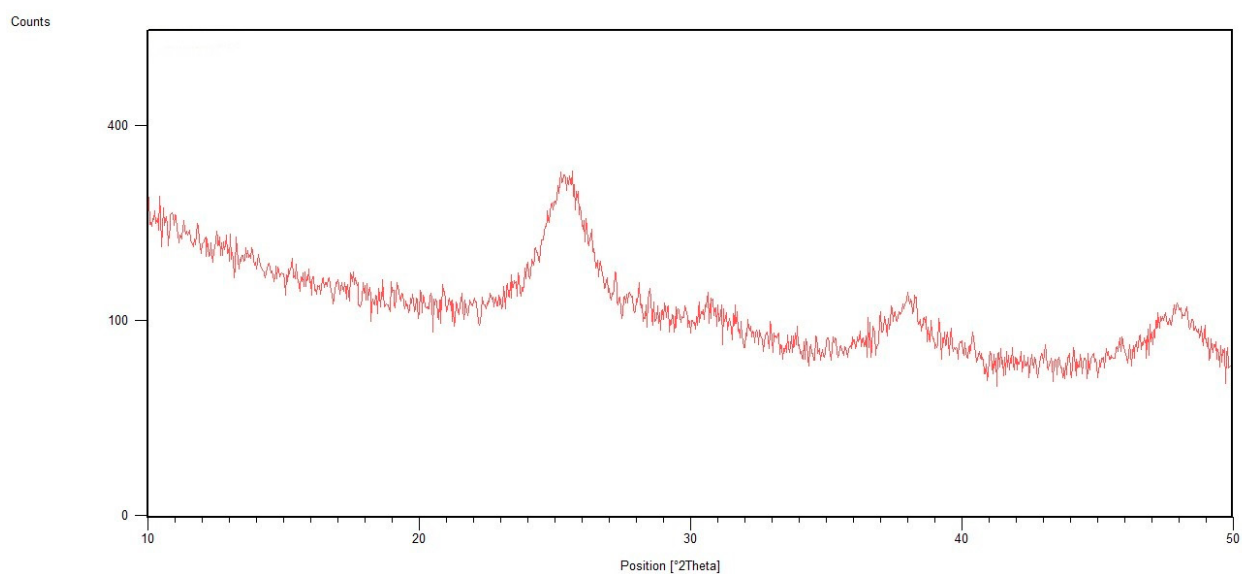

**Figure S4.** XRPD pattern of sample with molar ratio  $C_{12}H_{28}O_4Ti:CO(NH_2)_2:NH_4Cl$  10:1: 0, 50 °C.

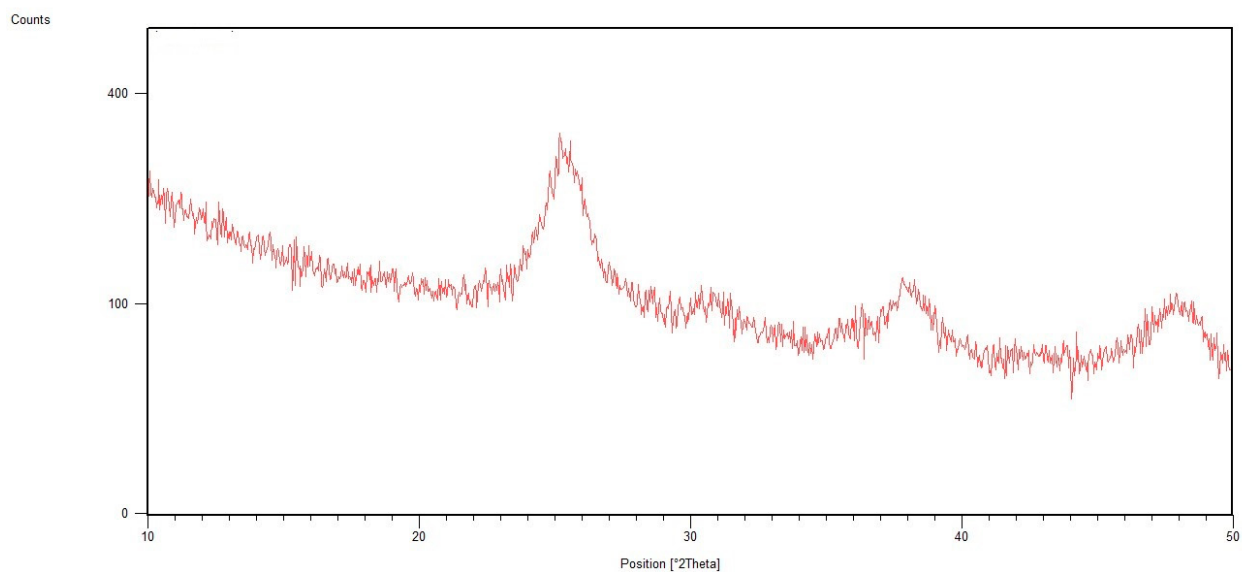

**Figure S5.** XRPD pattern of sample with molar ratio  $C_{12}H_{28}O_4Ti:CO(NH_2)_2:NH_4Cl$  2:1: 0, 50 °C.

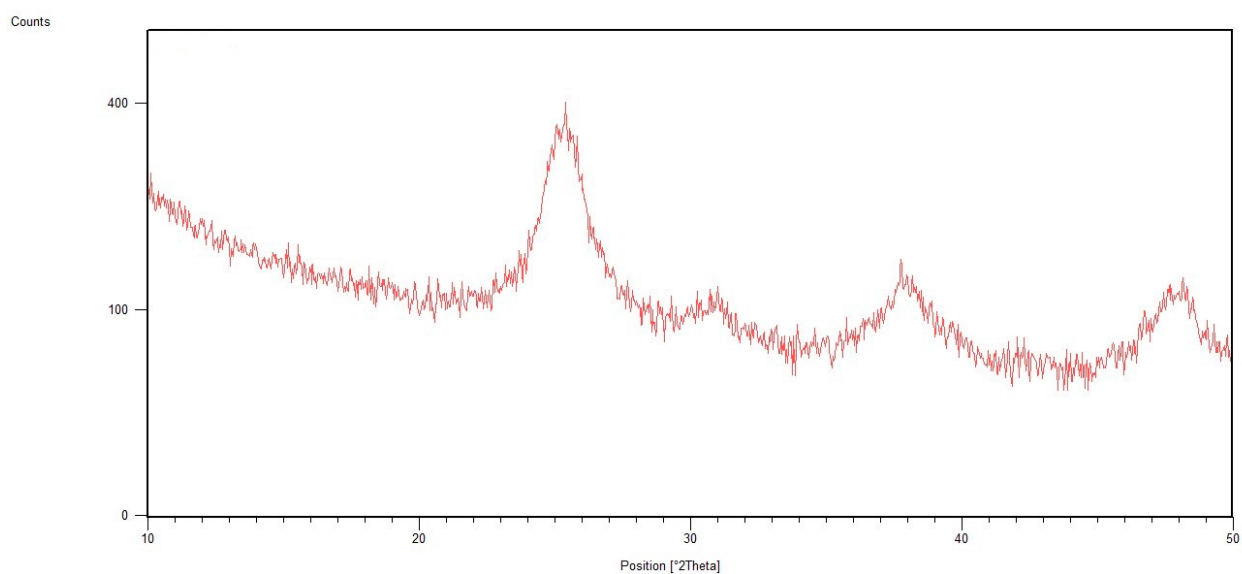

**Figure S6.** XRPD pattern of sample with molar ratio  $\text{C}_{12}\text{H}_{28}\text{O}_4\text{Ti}:\text{CO}(\text{NH}_2)_2:\text{NH}_4\text{Cl}$  10:1: 0, r.t.

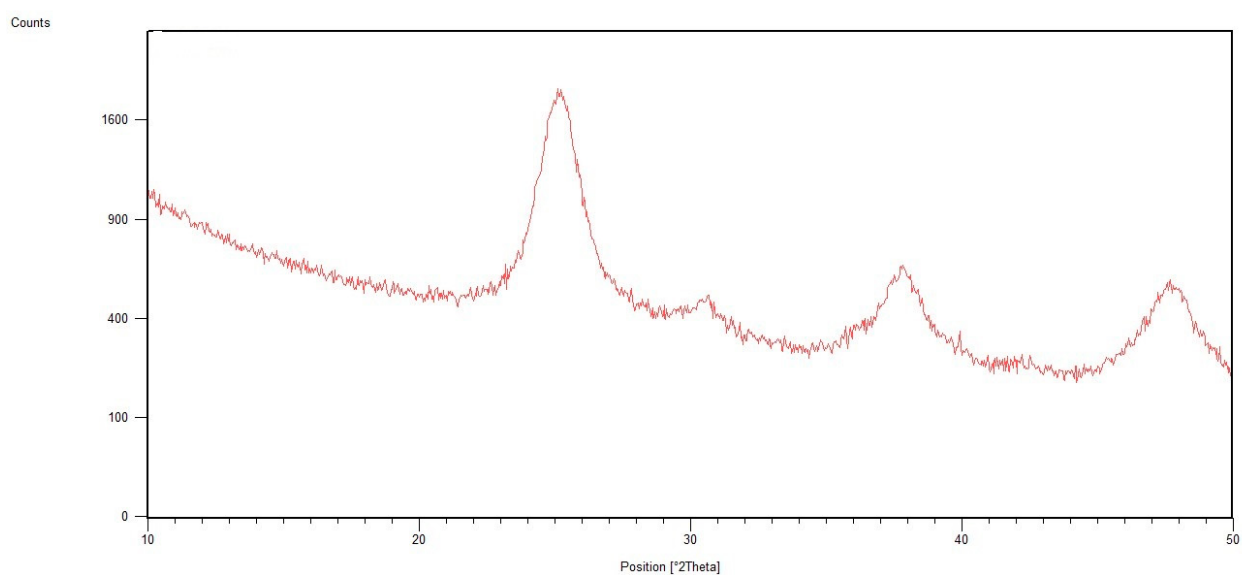

**Figure S7.** XRPD pattern of sample with molar ratio  $\text{C}_{12}\text{H}_{28}\text{O}_4\text{Ti}:\text{CO}(\text{NH}_2)_2:\text{NH}_4\text{Cl}$  2:1: 0, r.t.

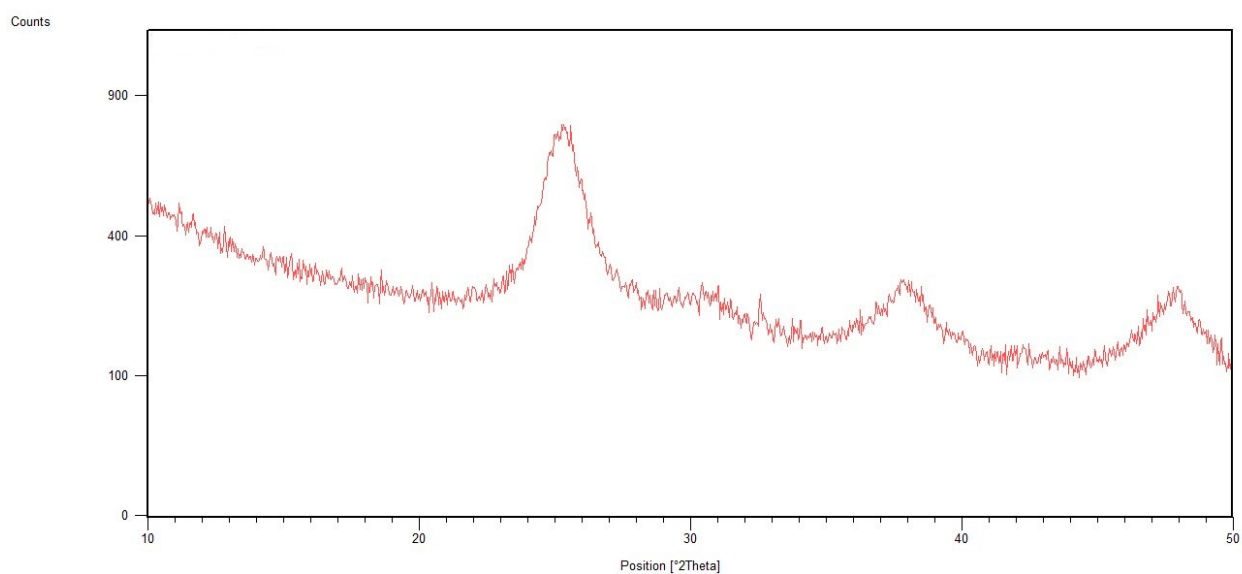

**Figure S8.** XRPD pattern of sample with molar ratio  $\text{C}_{12}\text{H}_{28}\text{O}_4\text{Ti}:\text{CO}(\text{NH}_2)_2:\text{NH}_4\text{Cl}$  10:1: 0.52, 50 °C.

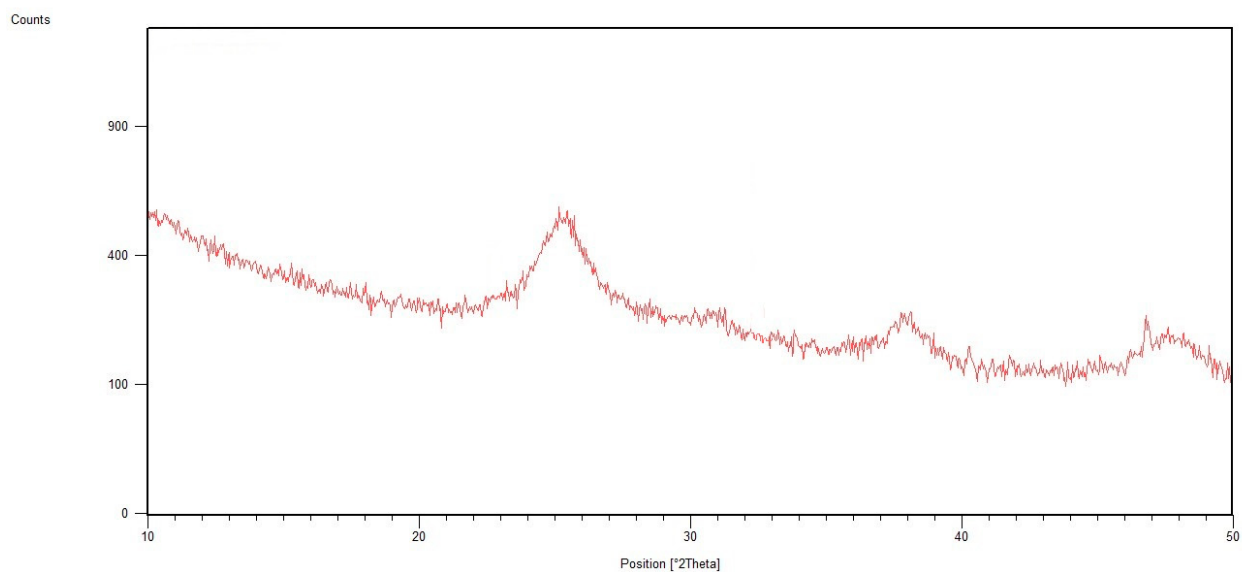

**Figure S9.** XRPD pattern of sample with molar ratio  $\text{C}_{12}\text{H}_{28}\text{O}_4\text{Ti}:\text{CO}(\text{NH}_2)_2:\text{NH}_4\text{Cl}$  2:1: 0.52, 50 °C.

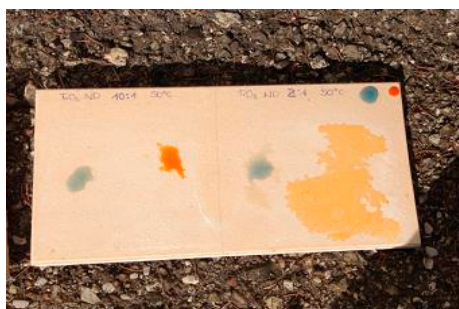

(a)

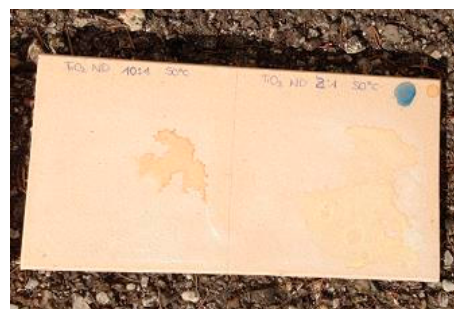

(b)

**Figure S10.** Ceramic tiles with molar ratio  $\text{C}_{12}\text{H}_{28}\text{O}_4\text{Ti}:\text{CO}(\text{NH}_2)_2$  10:1 (left part of image) and 2:1 (right part of image), 50 °C, before (a) and after (b) ½ hour of sunlight exposure.

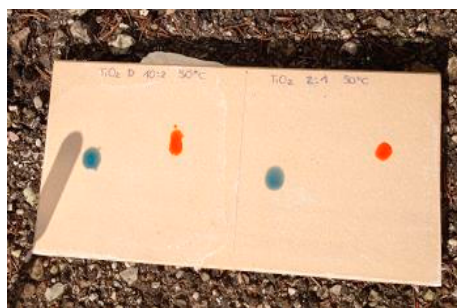

(a)

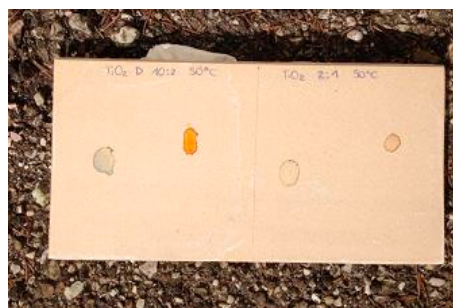

(b)

**Figure S11.** Ceramic tiles with molar ratio  $\text{C}_{12}\text{H}_{28}\text{O}_4\text{Ti}:\text{CO}(\text{NH}_2)_2:\text{NH}_4\text{Cl}$  10:1:0.52 (left part of image) and 2:1:0.52 (right part of image), 50 °C, before (a) and after (b) ½ hour of sunlight exposure.

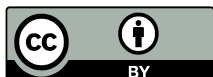

Supplement: Supplementary file 1 [file materials-10-01208-s001.pdf]
